# Supplementary material for: Novel biomarkers distinguishing pancreatic head Cancer from distal cholangiocarcinoma based on proteomic analysis
Source: Springer Nature journal article supplement (doi:10.1186/s12885-019-5548-x), 2019-04-05

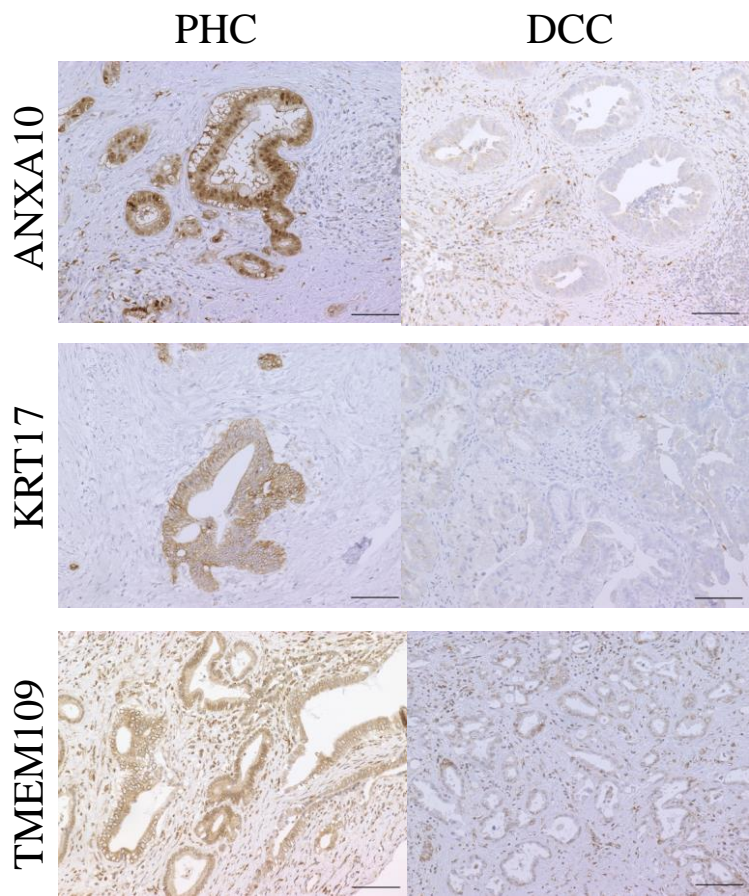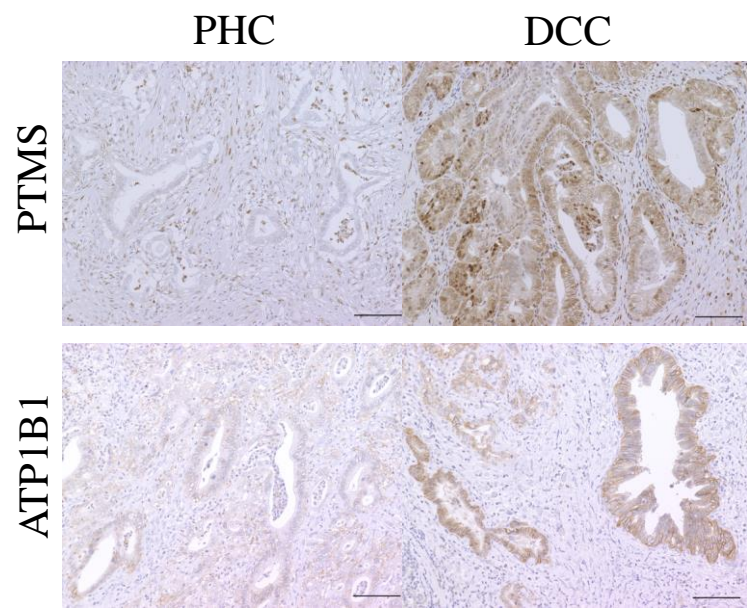

Supplement: MOESM2 [file 16619436]
